# Supplementary material for: Excessive reactive oxygen species are therapeutic targets for intervertebral disc degeneration
Source: Springer Nature journal article supplement (doi:10.1186/s13075-015-0834-8), 2015-11-05

## Supplementary Figure 1

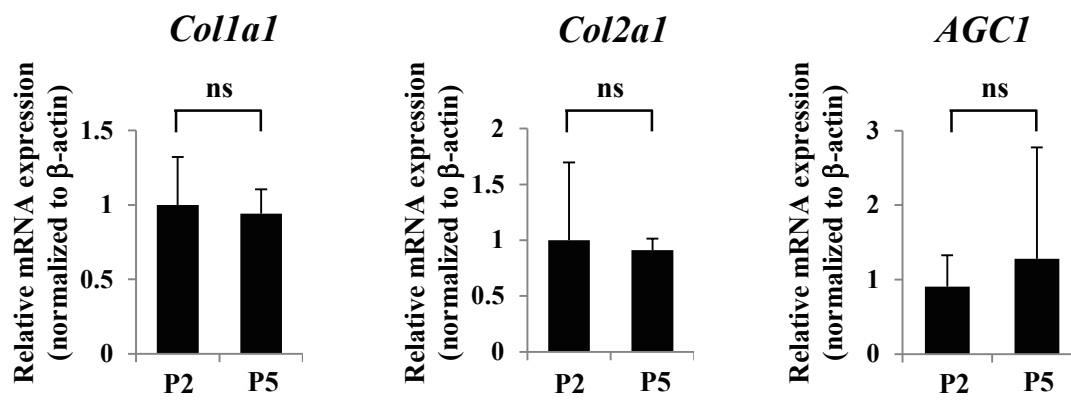

Supplement: MOESM1 [file 9784110]
